# Supplementary material for: Prognostic Biomarker Identification Through Integrating the Gene Signatures of Hepatocellular Carcinoma Properties
Source: PubMed Central journal article supplement (PMC5440601; doi:10.1016/j.ebiom.2017.04.014), 2017-04-12

## Supplementary Tables and Figures

**Table S1.** Univariate Cox regression analyses for the influences of the clinical characteristics on the overall survival of HCC patients in datasets GSE14520 and GSE54236.

**Table S2.** Univariate Cox regression analyses of the nearest template prediction (NTP) results of the gene signatures and the overall survival of HCC patients in datasets GSE14520 (N = 242) and GSE54236 (N = 78).

**Table S3.** Eleven gene signatures that were associated with the overall survival of HCC patients in the two independent cohorts.

**Table S4.** The basic characteristics of the HCC patients in the tissue microarray construction and IHC tests.

**Table S5.** Univariate and multivariate analyses of the clinical and pathological characteristics for the OS of the HCC patients in validation cohort (N = 78).

**Fig. S1.** Kaplan-Meier plots and log-rank tests for the 8 gene signatures that were not associated with the overall survival of HCC patients in GSE14520.

**Fig. S2.** Kaplan-Meier plots and log-rank tests for the 11 gene signatures that were not associated with the OS of HCC patients in GSE54236.

**Fig. S3.** The functional PPI network derived from the 11 gene signatures that were significantly associated with the overall survival of the HCC patients in datasets GSE14520 (N = 242) and GSE54236 (N = 78). (a) An organic layout for the PPI network of the gene signatures. Green nodes are genes that are included in the gene signatures; red nodes are those linker genes inferred from the Reactome FI plugin of

Cytoscape. (b) Nodes degree distribution corresponding to their degree. A power law was fitted by  $Y = 423.2 * X^{-1.224}$  ( $R^2 = 0.865$ ). The x- and y-axes are presented as logarithm scales. (c) Clustering coefficient distribution of the nodes; the x-axis is presented as a logarithm scale. (d) Path length distribution between the nodes.

**Fig. S4.** Representative figures for protein expression patterns in HCC (low, moderate or high) and adjacent normal tissues.

**Fig. S5.** The Kaplan-Meier plot and log-rank test for the overall survival of HCC patients in the validation group (N = 78) with higher vs. lower expression of CDK1.

**Fig. S6.** CDK1 inhibition reduces the viability and proliferation of HCC cells. (a) The OD450 values for cellular proliferation of CSQT-2 cells with RAD21, CDK1, or HDAC2 siRNA knockdown and the corresponding control group.  $**P < 0.001$  for one-way ANOVA tests among the groups. (b) Western blotting for the endogenous proteins in the RAD21, CDK1, or HDAC2 siRNA-transfected CSQT-2 cells. (c) Dose-responses of RO-3306 on the viability of CSQT-2, Huh-7, Hep3B and SMMC-7721 cells. (d) RO-3306 (12.5  $\mu$ M) significantly inhibited the cellular proliferation of CSQT-2, Hep3B and Huh-7 cells.  $**P < 0.01$  for the control group vs. the RO-3306-treated group for each cell line at the indicated time (Student's t-tests).

**Table S1.** Univariate Cox regression analyses for the influences of the clinical characteristics on the overall survival of HCC patients in datasets GSE14520 and GSE54236.

| Variable                             | GSE14520 dataset |      |           |         | GSE54236 dataset |      |           |       |
|--------------------------------------|------------------|------|-----------|---------|------------------|------|-----------|-------|
|                                      | N                | HR   | 95% CI    | P       | N                | HR   | 95% CI    | P     |
| Gender (Male vs. Female)             | 242              | 1.86 | 0.90-3.83 | 0.093   | 78               | 1.23 | 0.69-2.19 | 0.486 |
| Age (>50 year vs. < 50 years)        | 242              | 0.92 | 0.62-1.38 | 0.688   |                  |      |           |       |
| HBV (CC vs AVR_CC)                   | 224              |      |           |         |                  |      |           |       |
| CC vs. AVR_CC                        |                  | 0.74 | 0.46-1.17 | 0.196   |                  |      |           |       |
| N vs. AVR_CC                         |                  | 0.71 | 0.17-2.99 | 0.638   |                  |      |           |       |
| Tumor size (Large vs. small)         | 241              | 1.96 | 1.31-2.93 | 0.001   |                  |      |           |       |
| Nodular number (Multiple vs. Single) | 242              | 1.65 | 1.06-2.57 | 0.025   |                  |      |           |       |
|                                      |                  |      | 1.26-20.6 |         |                  |      |           |       |
| Cirrhosis (Yes vs. No)               | 242              | 5.09 | 8         | 0.023   |                  |      |           |       |
| BCLC                                 | 225              |      |           |         |                  |      |           |       |
| B vs. A+0                            |                  | 2.67 | 1.47-4.85 | 0.001   |                  |      |           |       |
| C vs. A+0                            |                  | 4.97 | 2.97-8.34 | < 0.001 |                  |      |           |       |
| CLIP                                 | 225              |      |           |         |                  |      |           |       |
| I vs. 0                              |                  | 1.48 | 0.87-2.52 | 0.152   |                  |      |           |       |
| II vs. 0                             |                  | 3.26 | 1.84-5.76 | < 0.001 |                  |      |           |       |
|                                      |                  |      | 3.15-13.7 |         |                  |      |           |       |
| III vs. 0                            |                  | 6.58 | 3         | < 0.001 |                  |      |           |       |
| AFP (High vs. Low)                   | 238              | 1.69 | 1.13-2.53 | 0.011   |                  |      |           |       |
| ALT (high vs. Low)                   | 242              | 0.87 | 0.58-1.30 | 0.483   |                  |      |           |       |
| TNM                                  | 225              |      |           |         |                  |      |           |       |
| II vs. I                             |                  | 2.16 | 1.25-3.75 | 0.006   |                  |      |           |       |
| III vs. I                            |                  | 5.41 | 3.11-9.41 | < 0.001 |                  |      |           |       |
| Doubling Time (Low vs. High)         |                  |      |           |         | 78               | 0.50 | 0.30-0.83 | 0.007 |

**Table S2.** Univariate Cox regression analyses of the nearest template prediction (NTP) results of the gene signatures and the overall survival of HCC patients in datasets GSE14520 (N = 242) and GSE54236 (N = 78).

| Variable              | GSE14520 dataset |      |           |         | GSE54236 dataset |      |            |         |
|-----------------------|------------------|------|-----------|---------|------------------|------|------------|---------|
|                       | N                | HR   | 95% CI    | P       | N                | HR   | 95% CI     | P       |
| CC_Woo                | 242              |      |           |         | 78               |      |            |         |
| Unclassified vs. Good |                  | 1.35 | 0.73-2.49 | 0.342   |                  | 1.71 | 0.87-3.35  | 0.12    |
| Poor vs. Good         |                  | 2.55 | 1.65-3.95 | < 0.001 |                  | 1.79 | 1.08-2.95  | 0.023   |
| OS_Lee                | 242              |      |           |         | 78               |      |            |         |
| Unclassified vs. Good |                  | 1.66 | 0.91-3.04 | 0.099   |                  | 0.41 | 0.18-0.94  | 0.035   |
| Poor vs. Good         |                  | 3.13 | 1.99-4.91 | < 0.001 |                  | 1.75 | 1.08-2.86  | 0.025   |
| Proliferation_Chiang  | 242              |      |           |         | 78               |      |            |         |
| Unclassified vs. Good |                  | 1.05 | 0.56-1.96 | 0.876   |                  | 0.92 | 0.46-1.85  | 0.817   |
| Poor vs. Good         |                  | 2.42 | 1.56-3.76 | < 0.001 |                  | 2.36 | 1.43-3.92  | < 0.001 |
| G3_Boyault            | 242              |      |           |         | 78               |      |            |         |
| Unclassified vs. Good |                  | 2.02 | 1.16-3.51 | 0.012   |                  | 0.97 | 0.52-1.83  | 0.934   |
| Poor vs. Good         |                  | 2.34 | 1.46-3.75 | < 0.001 |                  | 2.63 | 1.58-4.39  | < 0.001 |
| S2_Hoshida            | 242              |      |           |         | 78               |      |            |         |
| Unclassified vs. Good |                  | 1.46 | 0.88-2.43 | 0.142   |                  | 1.69 | 1.02-2.80  | 0.042   |
| Poor vs. Good         |                  | 1.81 | 1.13-2.89 | 0.014   |                  | 2.51 | 1.26-4.99  | 0.009   |
| CK19_Andersen         | 242              |      |           |         | 78               |      |            |         |
| Unclassified vs. Good |                  | 1.08 | 0.63-1.85 | 0.785   |                  | 1.18 | 0.67-2.09  | 0.571   |
| Poor vs. Good         |                  | 2.62 | 1.65-4.15 | < 0.001 |                  | 2.69 | 1.55-4.65  | < 0.001 |
| Recurrence_Woo        | 242              |      |           |         | 78               |      |            |         |
| Unclassified vs. Good |                  | 1.86 | 1.13-3.05 | 0.014   |                  | 0.96 | 0.53-1.17  | 0.898   |
| Poor vs. Good         |                  | 2.26 | 1.39-3.68 | 0.001   |                  | 1.13 | 0.68-1.89  | 0.636   |
| OS_Kim                | 242              |      |           |         | 78               |      |            |         |
| Unclassified vs. Good |                  | 1.64 | 1.01-2.65 | 0.048   |                  | 1.14 | 0.66-1.99  | 0.636   |
| Poor vs. Good         |                  | 2.08 | 1.28-3.40 | 0.003   |                  | 1.27 | 0.74-2.19  | 0.388   |
| CSC_Yamashita         | 242              |      |           |         | 78               |      |            |         |
| Unclassified vs. Good |                  | 1.62 | 1.03-2.56 | 0.037   |                  | 1.63 | 1.01-2.65  | 0.046   |
| Poor vs. Good         |                  | 2.09 | 1.19-3.65 | 0.01    |                  | 3.16 | 1.41-7.08  | 0.005   |
| EPCAM_Yamashita       | 242              |      |           |         | 78               |      |            |         |
| Unclassified vs. Good |                  | 1.99 | 1.09-3.63 | 0.026   |                  | 1.28 | 0.73-2.25  | 0.383   |
| Poor vs. Good         |                  | 3.19 | 1.73-5.88 | < 0.001 |                  | 2.79 | 1.37-5.68  | 0.005   |
| VI_Minguez            | 242              |      |           |         | 78               |      |            |         |
| Unclassified vs. Good |                  | 1.42 | 0.87-2.31 | 0.165   |                  | 1.42 | 0.88-2.29  | 0.146   |
| Poor vs. Good         |                  | 2.62 | 1.45-4.74 | 0.001   |                  | 3.64 | 1.25-10.58 | 0.018   |
| C2_Cario              | 242              |      |           |         | 78               |      |            |         |
| Unclassified vs. Good |                  | 1.66 | 1.01-2.73 | 0.047   |                  | 0.85 | 0.51-1.45  | 0.558   |
| Poor vs. Good         |                  | 3.05 | 1.61-5.80 | < 0.001 |                  | 2.1  | 0.92-4.80  | 0.079   |
| Recurrence_Wang       | 242              |      |           |         | 78               |      |            |         |
| Unclassified vs. Good |                  | 2.11 | 1.12-4.00 | 0.021   |                  | 1.69 | 0.93-3.06  | 0.084   |
| Poor vs. Good         |                  | 2.89 | 1.35-6.16 | 0.006   |                  | 3.16 | 1.17-8.50  | 0.023   |

Table S2. Continued.

| Variable              | GSE14520 dataset |      |            |       | GSE54236 dataset |      |            |         |
|-----------------------|------------------|------|------------|-------|------------------|------|------------|---------|
|                       | N                | HR   | 95% CI     | P     | N                | HR   | 95% CI     | P       |
| MET_Kaposi-Novak      | 242              |      |            |       | 78               |      |            |         |
| Unclassified vs. Good |                  | 2.77 | 1.28-6.01  | 0.01  |                  | 0.98 | 0.51-1.88  | 0.947   |
| Poor vs. Good         |                  | 2.86 | 1.13-7.28  | 0.027 |                  | 6.04 | 2.58-14.12 | < 0.001 |
| Monocyte_Sakai        | 242              |      |            |       | 78               |      |            |         |
| Unclassified vs. Good |                  | 0.6  | 0.38-0.96  | 0.034 |                  | 1.16 | 0.59-2.29  | 0.662   |
| Poor vs. Good         |                  | 5.9  | 1.98-17.58 | 0.001 |                  | 1.43 | 0.62-3.03  | 0.402   |
| S1_Hoshida            | 242              |      |            |       | 78               |      |            |         |
| Unclassified vs. Good |                  | 1.69 | 1.04-2.72  | 0.033 |                  | 1.61 | 0.91-2.86  | 0.103   |
| Poor vs. Good         |                  | 1.52 | 0.92-2.50  | 0.102 |                  | 1.44 | 0.85-2.41  | 0.173   |
| CTNNB1_Chiang         | 242              |      |            |       | 78               |      |            |         |
| Unclassified vs. Good |                  | 1.37 | 0.87-2.17  | 0.176 |                  | 1.65 | 0.94-2.91  | 0.084   |
| Poor vs. Good         |                  | 0.8  | 0.44-1.47  | 0.478 |                  | 1.49 | 0.84-2.63  | 0.169   |
| TGFB_Coulouarn        | 242              |      |            |       | 78               |      |            |         |
| Unclassified vs. Good |                  | 1.21 | 0.75-1.97  | 0.438 |                  | 1.1  | 0.67-1.81  | 0.715   |
| Poor vs. Good         |                  | 1.77 | 0.98-3.18  | 0.056 |                  | 2.23 | 1.17-4.28  | 0.016   |
| Interfron_Chiang      | 242              |      |            |       | 78               |      |            |         |
| Unclassified vs. Good |                  | 1.43 | 0.79-2.58  | 0.243 |                  | 1.28 | 0.68-2.39  | 0.443   |
| Poor vs. Good         |                  | 0.89 | 0.43-1.84  | 0.747 |                  | 0.66 | 0.32-1.36  | 0.263   |
| G5/6_Boyault          | 242              |      |            |       | 78               |      |            |         |
| Unclassified vs. Good |                  | 0.71 | 0.43-1.16  | 0.173 |                  | 1.18 | 0.60-2.32  | 0.639   |
| Poor vs. Good         |                  | 0.57 | 0.28-1.13  | 0.11  |                  | 1.73 | 0.73-4.13  | 0.214   |
| VAG_Ko                | 242              |      |            |       | 78               |      |            |         |
| Unclassified vs. Good |                  | 1.64 | 0.75-3.56  | 0.215 |                  | 0.7  | 0.33-1.47  | 0.344   |
| Poor vs. Good         |                  | 1.74 | 0.74-4.09  | 0.206 |                  | 1.12 | 0.45-2.80  | 0.814   |
| G6_Boyault            | 242              |      |            |       | 78               |      |            |         |
| Unclassified vs. Good |                  | 1.06 | 0.59-1.92  | 0.849 |                  | 1.16 | 0.62-2.18  | 0.646   |
| Poor vs. Good         |                  | 0.76 | 0.35-1.65  | 0.491 |                  | 1.52 | 0.69-3.32  | 0.300   |
| G2_Roessler           | 242              |      |            |       | NA               |      |            |         |
| Unclassified vs. Good |                  | 2.56 | 1.03-6.30  | 0.042 |                  |      |            |         |
| Poor vs. Good         |                  | 2.93 | 0.85-10.12 | 0.090 |                  |      |            |         |
| Lymphocyte_Chew       | NA               |      |            |       | 78               |      |            |         |
| Unclassified vs. Good |                  |      |            |       |                  | 1.59 | 0.92-2.75  | 0.094   |
| Poor vs. Good         |                  |      |            |       |                  | 1.47 | 0.49-4.38  | 0.49    |

**Abbreviations:** HR, hazard ratio; 95% CI, 95% confidential interval; NA, not applicable.

**Table S3.** Eleven gene signatures that were associated with the overall survival of HCC patients in the two independent cohorts.

| <b>No. of the gene signature</b> | <b>Gene signature</b> |
|----------------------------------|-----------------------|
| 1                                | CK19_Andersen         |
| 2                                | S2_Hoshida            |
| 3                                | CC_Woo                |
| 4                                | VI_Minguez            |
| 5                                | Recurrence_Wang       |
| 6                                | CSC_Yamashita         |
| 7                                | EPCAM_Yamashita       |
| 8                                | OS_Lee                |
| 9                                | MET_Kaposi-Novak      |
| 10                               | Proliferation_Chiang  |
| 11                               | G3_Boyault            |

**Table S4.** The basic characteristics of the HCC patients in the tissue microarray construction and IHC tests.

| <b>Characteristics</b>                               | <b>HCC cohort I<br/>(N = 60)</b> | <b>Validation<br/>Cohort (N = 78)</b> | <b>P</b> |
|------------------------------------------------------|----------------------------------|---------------------------------------|----------|
| Age (year, $\pm$ SD)                                 | 51.8 $\pm$ 9.67                  | 49.2 $\pm$ 10.23                      | < 0.001  |
| Sex (Male/Female)                                    | 50/10                            | 73/5                                  | 0.100    |
| HbeAg (Positive vs. Negative)                        | 15/45                            | 22/56                                 | 0.820    |
| Tumor diameter (> 3 vs. $\leq$ 3 cm)                 | 44/16                            | 59/19                                 | 0.911    |
| Multiple nodes (No. vs. Yes)                         | 52/8                             | 44/34                                 | < 0.001  |
| Tumor encapsulation<br>(Complete/Incomplete/Absence) | 23/23/14                         | 32/21/25                              | 0.308    |
| Cirrhosis (Child-Pugh B+C vs. A)                     | 24/36                            | 14/64                                 | 0.008    |
| Tumor differentiation (III vs. II+I)                 | 50/10                            | 60/18                                 | 0.475    |
| Microscopic vascular invasion<br>(Yes vs. No)        | 13/47                            | 36/42                                 | 0.005    |
| BCLC stage (B+C vs. 0+A)                             | 18/42                            | 38/40                                 | 0.041    |
| AFP (> 20 vs. $\leq$ 20 ng/mL)                       | 42/18                            | 55/23                                 | 1.000    |
| $\gamma$ -GT (> 50 vs. $\leq$ 50 U/L)                | 43/17                            | NA                                    | NA       |

**Abbreviations:** AFP,  $\alpha$ -fetoprotein; BCLC, Barcelona Clinic Liver Cancer stage;  $\gamma$ -GT,  $\gamma$ -glutamyl transpeptidase; NA, not applicable.

**Table S5.** Univariate and multivariate analyses of the clinical and pathological characteristics for the OS of the HCC patients in validation cohort (N = 78).

| Characteristics                            | Univariate analysis |         | Multivariate analysis |         |
|--------------------------------------------|---------------------|---------|-----------------------|---------|
|                                            | HR (95% CI)         | P-value | HR (95% CI)           | P-value |
| Age, per year                              | 1.01 (0.97-1.05)    | 0.811   |                       |         |
| Sex (Male vs. Female)                      | 1.55 (0.21-11.47)   | 0.671   |                       |         |
| HbeAg (Positive vs. Negative)              | 0.47 (0.16-1.38)    | 0.167   |                       |         |
| Tumor diameter (> 3 vs. ≤3 cm)             | 1.55 (0.53-4.57)    | 0.424   |                       |         |
| Multiple nodule (Yes vs. No)               | 4.25 (1.67-10.78)   | 0.002   | 3.86 (1.52-9.83)      | 0.005   |
| Tumor encapsulation                        |                     |         |                       |         |
| Complete vs. Absence                       | 0.28 (0.10-0.80)    | 0.017   |                       |         |
| Incomplete vs. Absence                     | 0.52 (0.20-1.40)    | 0.198   |                       |         |
| Cirrhosis (Child-Pugh B+C vs. A)           | 1.12 (0.41-3.01)    | 0.828   |                       |         |
| Tumor differentiation (III vs. II)         | 2.19 (0.65-7.38)    | 0.205   |                       |         |
| Microscopic vascular invasion (Yes vs. No) | 2.69 (1.14-6.34)    | 0.024   |                       |         |
| BCLC stage (B+C vs. 0+A)                   | 2.87 (1.18-6.99)    | 0.020   |                       |         |
| AFP (> 20 vs. ≤ 20 ng/mL)                  | 2.28 (0.78-6.72)    | 0.133   |                       |         |
| CDK1 (High vs. Low)                        | 3.14 (1.33-7.41)    | 0.009   | 2.78 (1.18-6.59)      | 0.020   |

**Abbreviations:** AFP,  $\alpha$ -fetoprotein; HR, hazard ratio; 95% CI, 95% confidential interval; BCLC, Barcelona Clinic Liver Cancer stage.



**Fig. S1.** Kaplan-Meier plots and log-rank tests for the 8 gene signatures that were not associated with the overall survival of HCC patients in GSE14520.

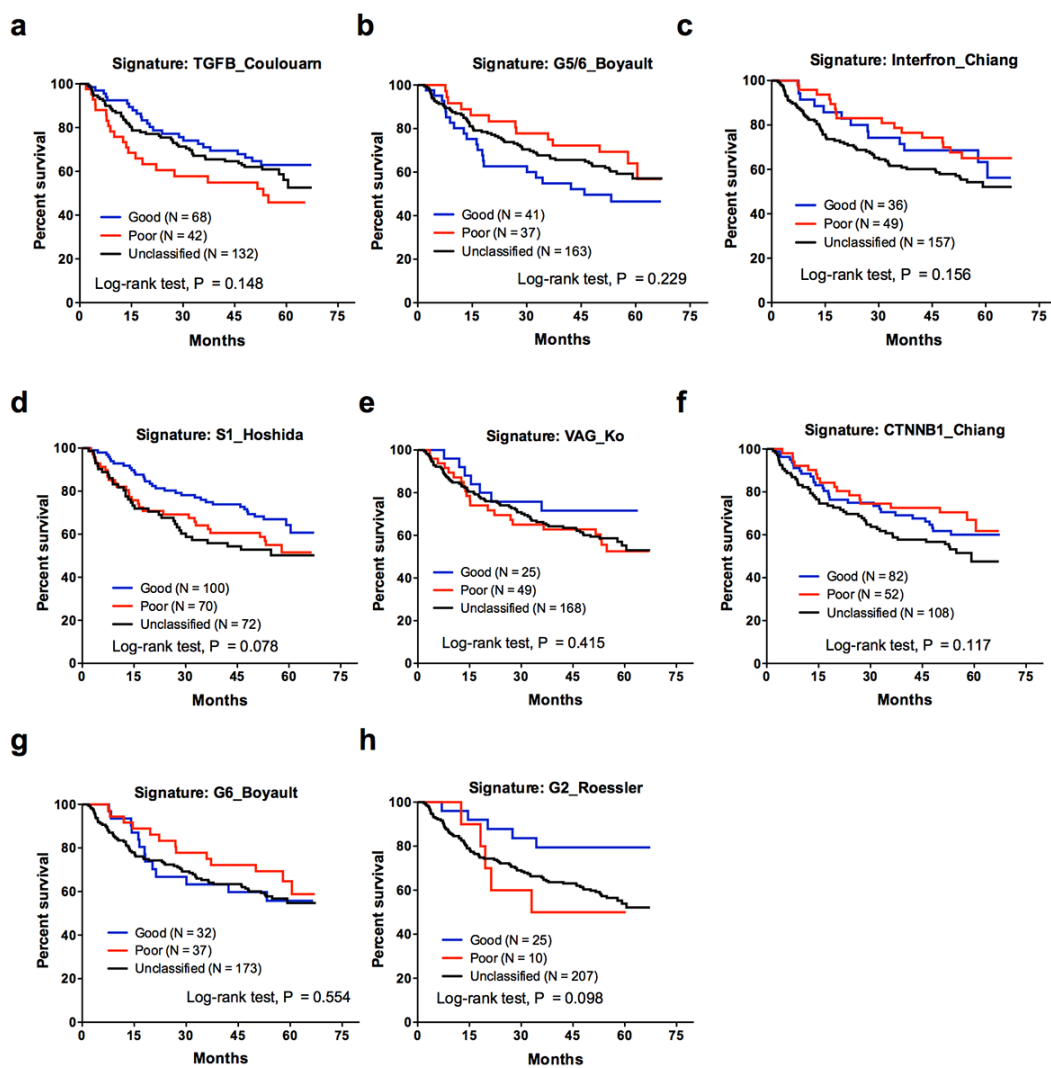

**Fig. S2.** Kaplan-Meier plots and log-rank tests for the 11 gene signatures that were not associated with the OS of HCC patients in GSE54236.

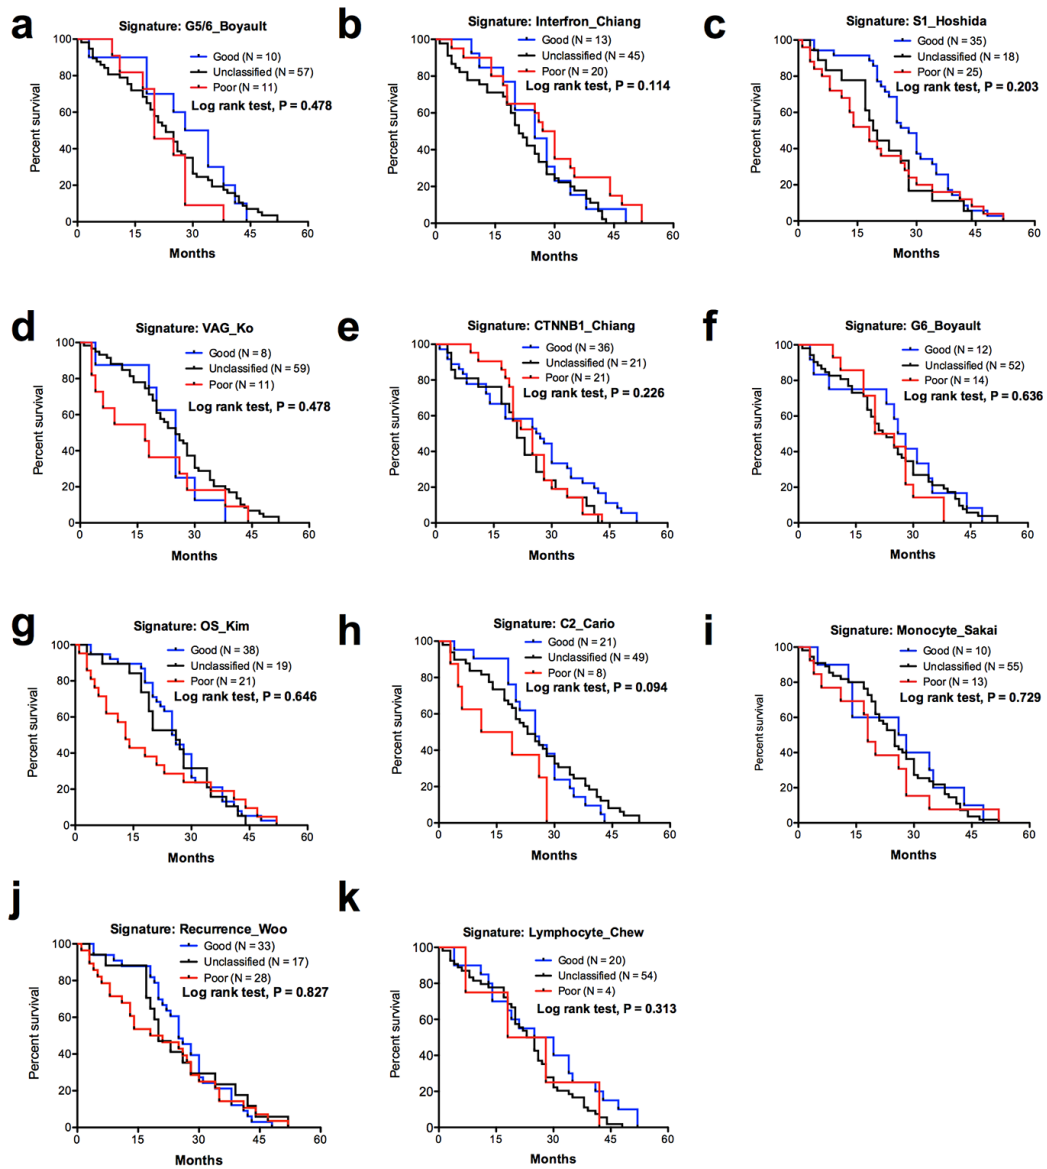

**Fig. S3.** The functional PPI network derived from the 11 gene signatures that were significantly associated with the overall survival of the HCC patients in datasets GSE14520 (N = 242) and GSE54236 (N = 78). (a) An organic layout for the PPI network of the gene signatures. Green nodes are genes that are included in the gene signatures; red nodes are those linker genes inferred from the Reactome FI plugin of Cytoscape. (b) Nodes degree distribution corresponding to their degree. A power law was fitted by  $Y = 423.2 * X^{-1.224}$  ( $R^2 = 0.865$ ). The x- and y-axes are presented as logarithm scales. (c) Clustering coefficient distribution of the nodes; the x-axis is presented as a logarithm scale. (d) Path length distribution between the nodes.

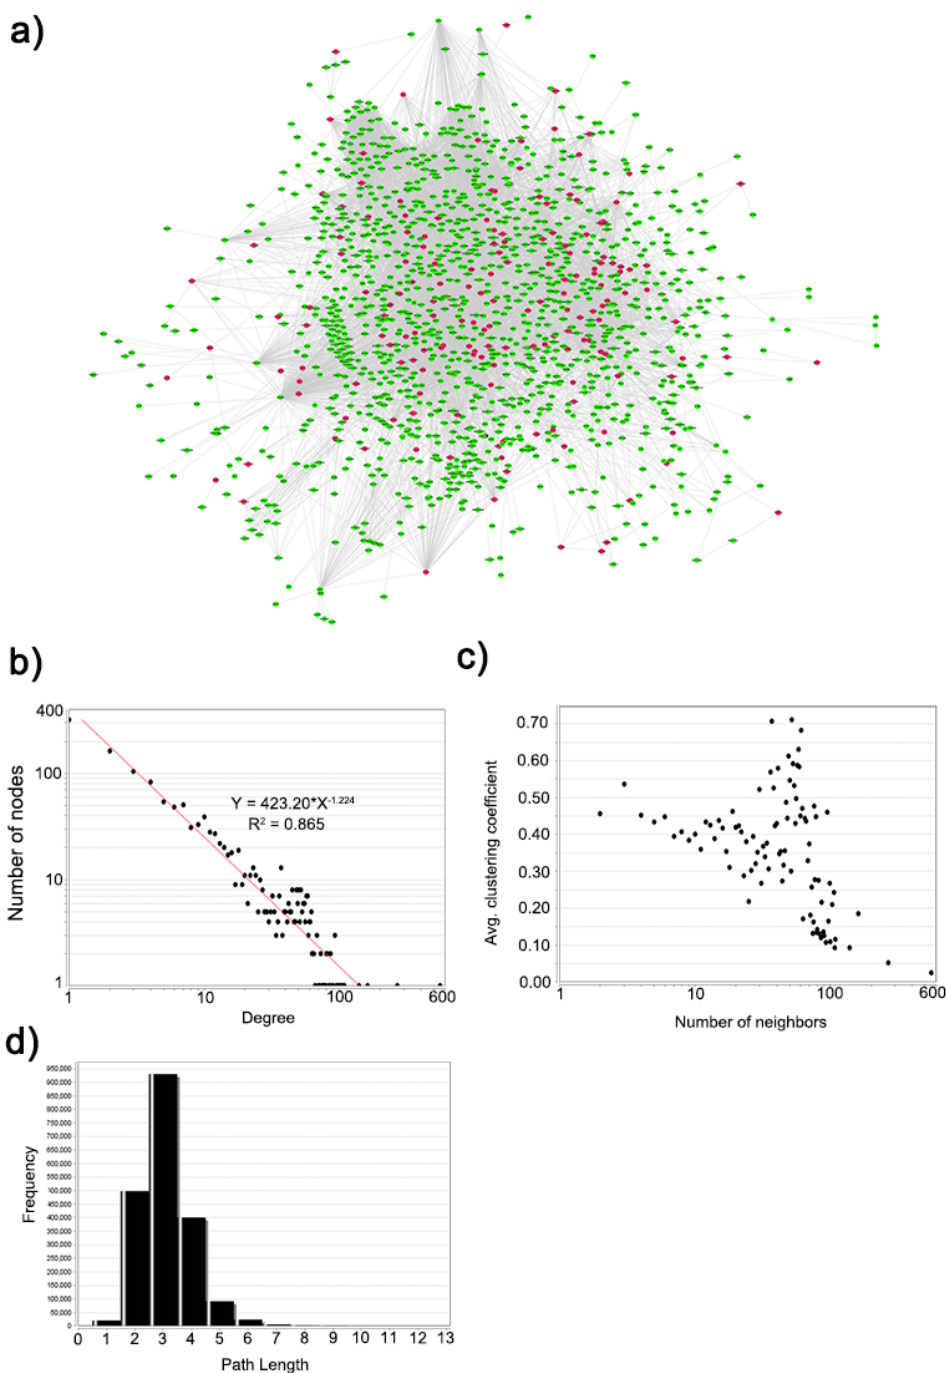

**Fig. S4.** Representative figures for protein expression patterns in HCC (low, moderate or high) and adjacent normal tissues.

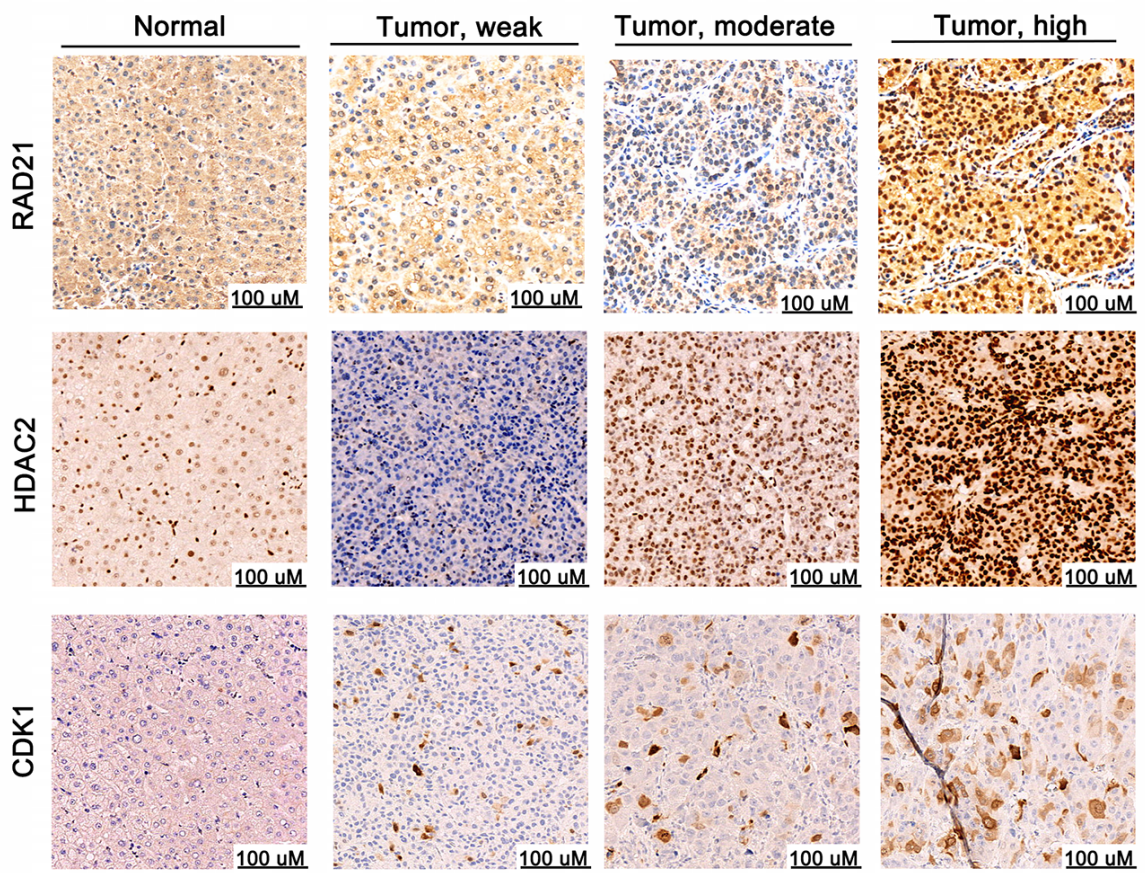

**Fig S5.** The Kaplan-Meier plot and log-rank test for the overall survival of HCC patients in the validation group (N = 78) with higher vs. lower expression level of CDK1.

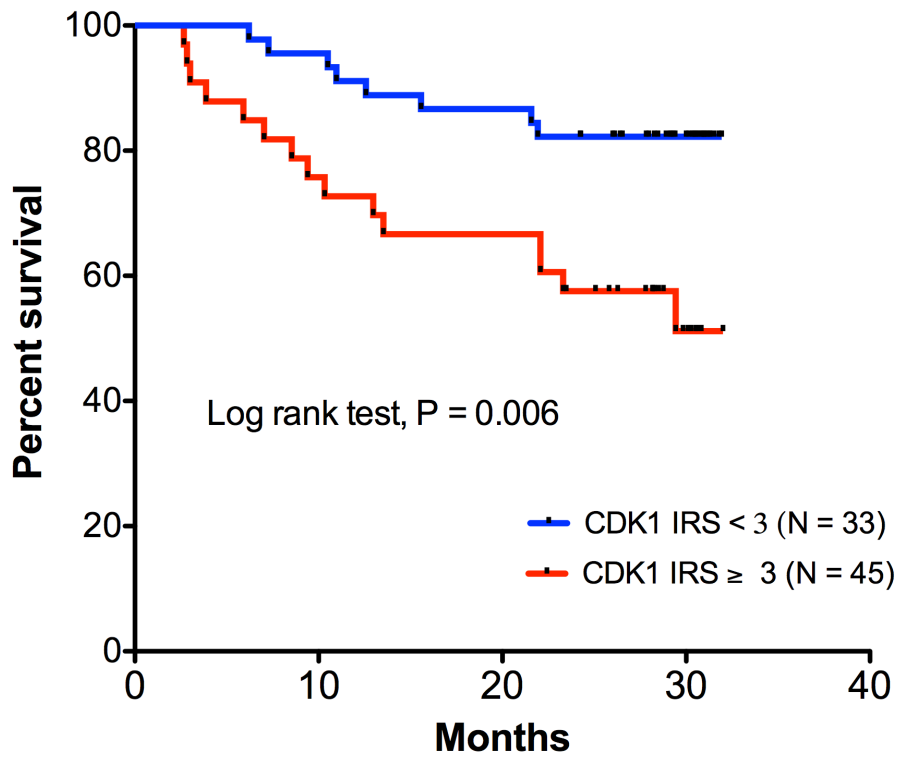

**Fig. S6.** CDK1 inhibition reduces the viability and proliferation of HCC cells. (a) The OD450 values for cellular proliferation of CSQT-2 cells with RAD21, CDK1, or HDAC2 siRNA knockdown and the corresponding control group.  $**P < 0.001$  for one-way ANOVA tests among the groups. (b) Western blotting for the endogenous proteins in the RAD21, CDK1, or HDAC2 siRNA-transfected CSQT-2 cells. (c) Dose-responses of RO-3306 on the viability of CSQT-2, Huh-7, Hep3B and SMMC-7721 cells. (d) RO-3306 (12.5  $\mu\text{M}$ ) significantly inhibited the cellular proliferation of CSQT-2, Hep3B and Huh-7 cells.  $**P < 0.01$  for the control group vs. the RO-3306-treated group for each cell line at the indicated time (Student's t-tests).

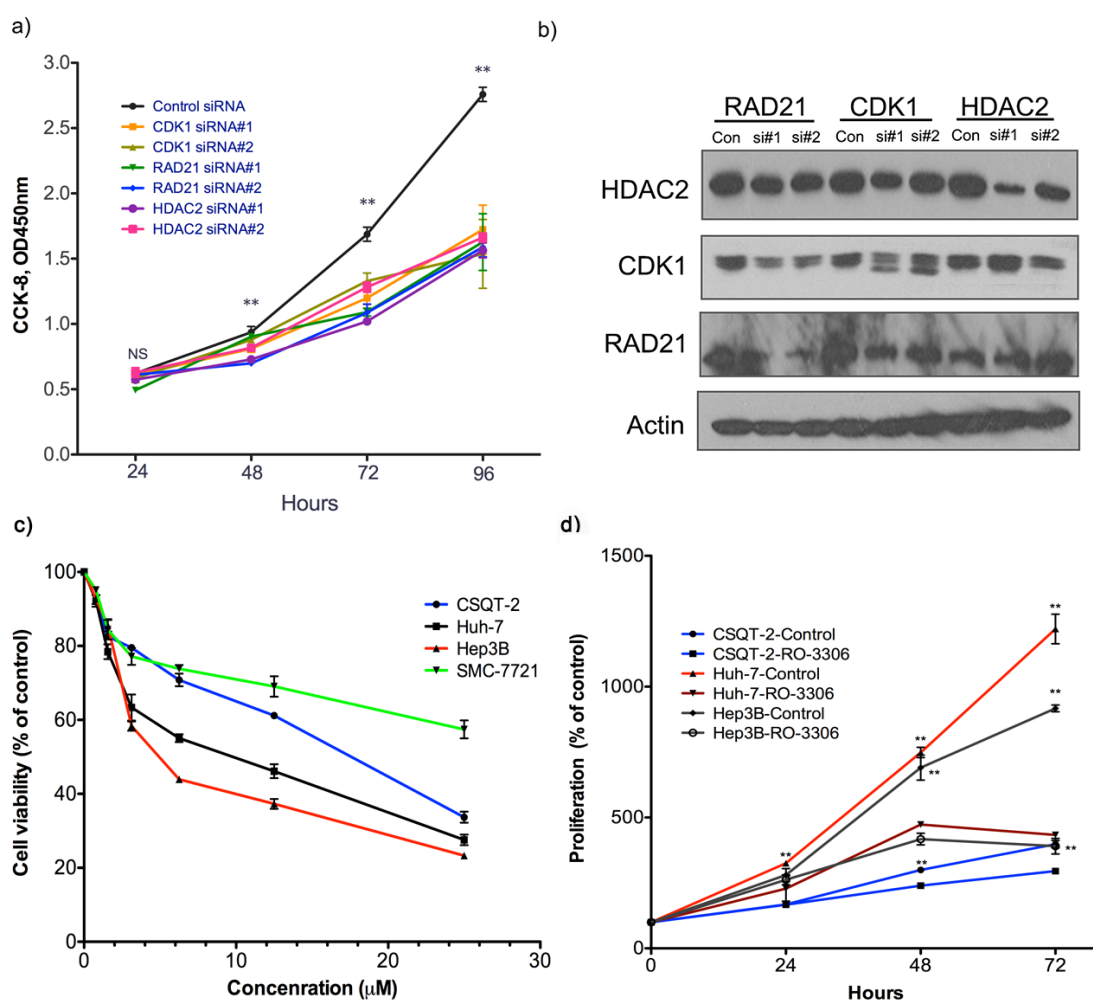

Supplement: mmc1.pdf [file mmc1.pdf]
